# Supplementary material
Source: publisher figshare collection journal article supplement (https://acs.figshare.com/ndownloader/files/8054933)
Supplement: Supplementary file 1 [file 8054933]

# Crystal Structure and Nontypical Deep-Red Luminescence of $\text{Ca}_3\text{Mg}[\text{Li}_2\text{Si}_2\text{N}_6]:\text{Eu}^{2+}$

Christine Poesl and Wolfgang Schnick\*<sup>✉</sup>

Department of Chemistry, University of Munich (LMU), Butenandtstr. 5-13 (D), 81377 Munich, Germany

**S** Supporting Information

**ABSTRACT:** Rare-earth-doped nitridosilicates exhibit outstanding luminescence properties and have been intensively studied for solid-state lighting. Here, we describe the new nitridolithosilicate  $\text{Ca}_3\text{Mg}[\text{Li}_2\text{Si}_2\text{N}_6]:\text{Eu}^{2+}$  with extraordinary luminescence characteristics. The compound was synthesized by the solid-state metathesis reaction in sealed Ta ampules. The crystal structure was solved and refined on the basis of single-crystal X-ray diffraction data.  $\text{Ca}_3\text{Mg}[\text{Li}_2\text{Si}_2\text{N}_6]:\text{Eu}^{2+}$  crystallizes in the monoclinic space group  $C2/m$  (no. 12) [ $Z = 4$ ,  $a = 5.966(1)$ ,  $b = 9.806(2)$ ,  $c = 11.721(2)$  Å,  $\beta = 99.67(3)^\circ$ ,  $V = 675.9(2)$  Å<sup>3</sup>] and exhibits a layered anionic network made up of edge- and corner-sharing  $\text{LiN}_4$  tetrahedra and  $[\text{Si}_2\text{N}_6]^{10-}$  bow-tie units. The network charge is compensated by  $\text{Ca}^{2+}$  and  $\text{Mg}^{2+}$  ions. Upon irradiation with UV to blue light, red emission at exceptionally long wavelengths ( $\lambda_{\text{em}} = 734$  nm,  $\text{fwhm} \approx 2293$  cm<sup>-1</sup>) is observed. According to emission in the near-infrared, application in LEDs for horticultural lighting appears promising.

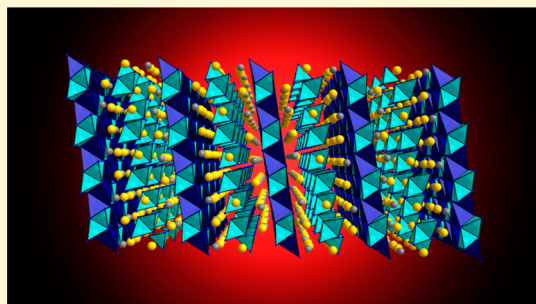

## INTRODUCTION

Nitridosilicates are characterized by their manifold structural chemistry and intriguing materials properties. Because of the high sensitivity to air and moisture of both starting materials and products, synthesis of less-condensed nitridosilicates is quite challenging. Over the last years, different synthetic approaches leading to nitridosilicates have been elaborated. These include high-temperature reactions, precursor routes, ammonothermal syntheses, and flux methods by using, for example, liquid sodium.<sup>1–9</sup> Solid-state metathesis reactions have gained significant importance as well because a variety of ternary or higher nitrides have recently been synthesized by this approach.<sup>10–15</sup> Thereby, a key feature is the employment of reactive starting materials by coproducing a metathesis salt, which on one hand drives the reaction thermodynamically and on the other hand concurrently acts as reactive flux. Common structural motifs of nitridosilicates are  $\text{SiN}_4$  tetrahedra, which may be linked through vertices and/or edges, forming more- or less-condensed anionic substructures ranging up to three-periodic anionic frameworks. The resulting structural diversity of nitridosilicates can be ascribed to the N atoms, which are able to connect up to four adjacent tetrahedral centers. Cations like alkaline earths ( $\text{AE}^{2+}$ ),  $\text{Li}^+$  or  $\text{Mg}^{2+}$  are distributed among the voids of the anionic networks and balance their charges. As some examples in the literature have already shown, the number of new nitrides can be further increased by partial substitution of  $\text{Si}^{4+}$  by  $\text{Li}^+$ ,  $\text{Mg}^{2+}$ , or  $\text{Al}^{3+}$ .<sup>12,13,16–19</sup> Complete exchange of  $\text{Si}^{4+}$  by  $\text{Ga}^{3+}$  or  $\text{Ge}^{4+}$  is also possible and results in the strongly related compound classes of nitridogallates and nitridogermanates, respectively

(see homeotypical compounds  $\text{Ba}[\text{Mg}_3\text{SiN}_4]$ ,  $\text{Sr}[\text{Mg}_3\text{GeN}_4]$ , and  $\text{M}[\text{Mg}_2\text{Ga}_2\text{N}_4]$  with  $\text{M} = \text{Sr}, \text{Ba}$ ).<sup>17,20,21</sup>

Nitridosilicates show a great diversity of interesting materials properties, e.g. high mechanical strength and high thermal stability of silicon nitride ceramics, lithium ion conductivity (e.g.,  $\text{Li}_2\text{SiN}_2$ )<sup>22,23</sup> or luminescence when doped with  $\text{Eu}^{2+}$  or  $\text{Ce}^{3+}$ .<sup>22,24–28</sup>  $(\text{Sr}, \text{Ba})_2\text{Si}_5\text{N}_8:\text{Eu}^{2+}$ ,<sup>29–31</sup>  $\text{CaAlSiN}_3:\text{Eu}^{2+}$ ,<sup>19</sup> and  $\text{Sr}[\text{Mg}_3\text{SiN}_4]:\text{Eu}^{2+16}$  represent prominent examples of rare-earth doped nitrides, which show strong broadband emission in the red spectral region after irradiation with blue light, originating from parity allowed  $4f^65d^1 \rightarrow 4f^7$  transitions in  $\text{Eu}^{2+}$  and spin and parity allowed  $4f^05d^1 \rightarrow 4f^1$  transitions in  $\text{Ce}^{3+}$ . Warm white light can be generated by a combination of red and green emitting phosphors, both covered on a blue LED chip, which is usually an  $(\text{In}, \text{Ga})\text{N}$  semiconductor chip.<sup>32,33</sup> The so-called phosphor-converted light-emitting diodes (pc-LEDs) are highly efficient and, over the past decade, developed into an energy-saving replacement for inefficient incandescent light bulbs. Because most commercially available warm white pc-LEDs still show a large portion of its emission beyond the sensitivity of the human eye,<sup>34,35</sup> research for narrow-band red emitting luminescent materials is of particular interest for general illumination purposes.

During our research for innovative red-emitting compounds, we came across  $\text{Ca}_3\text{Mg}[\text{Li}_2\text{Si}_2\text{N}_6]:\text{Eu}^{2+}$ , a new nitridolithosilicate with outstanding emission properties at fairly long wavelengths. In this contribution, we report on the synthesis,

Received: March 2, 2017

Revised: April 3, 2017

Published: April 3, 2017

77 structural elucidation, and optical properties of  $\text{Ca}_3\text{Mg}$ -  
78  $[\text{Li}_2\text{Si}_2\text{N}_6]\text{:Eu}^{2+}$ . Unprecedented luminescence properties differ  
79 essentially from previously described  $\text{Eu}^{2+}$ -doped nitridosili-  
80 cates and are discussed in detail, also in comparison to recently  
81 reported narrow-band red emitting  $\text{Eu}^{2+}$ -doped nitridosilicates.

## 82 ■ EXPERIMENTAL SECTION

83 **Synthesis.** Because of the sensitivity of the starting materials and  
84 the product toward air and moisture, all manipulations were performed  
85 under inert-gas conditions using argon filled glove boxes (Unilab,  
86 MBraun, Garching,  $\text{O}_2 < 1$  ppm,  $\text{H}_2\text{O} < 1$  ppm) and combined  
87 Schlenk/vacuum lines. Ar was dried and purified by passing it through  
88 glass tubes filled with silica gel (Merck), molecular sieve (Fluka, 4 Å),  
89  $\text{P}_4\text{O}_{10}$  (Roth,  $\geq 99\%$ ), and titanium sponge (Johnsen Matthey, 99.5%).  
90  $\text{Ca}_3\text{Mg}[\text{Li}_2\text{Si}_2\text{N}_6]\text{:Eu}^{2+}$  was synthesized by solid-state metathesis  
91 reaction using  $\text{Ca}(\text{NH}_2)_2$  (17.9 mg, 0.25 mmol, synthesized according  
92 to Brokamp),<sup>36</sup>  $\text{CaH}_2$  (8.3 mg, 0.20 mmol, Cerac, 99.5%),  $\text{MgF}_2$  (15.5  
93 mg, 0.25 mmol, ABCR, 99.99%),  $\text{Si}_3\text{N}_4$  (6.9 mg, 0.05 mmol, UBE,  
94 99.9%), 1.7 mol %  $\text{EuF}_3$  (0.9 mg,  $4.3 \times 10^{-3}$  mmol, Sigma-Aldrich,  
95 99.99%), and Li (9.8 mg, 1.41 mmol, Alfa Aesar, 99.9%) as starting  
96 materials. The powdery reactants were finely ground and placed with  
97 metallic Li in a tantalum ampule, which was weld shut in an arc  
98 furnace. The reaction mixture was heated up to 950 °C with a rate of  
99 300 °C·h<sup>-1</sup>, maintained for 24 h, subsequently cooled to 500 °C with a  
100 rate of 5 °C·h<sup>-1</sup>, and finally quenched to room temperature by  
101 switching off the furnace. Orange-colored single crystals of  $\text{Ca}_3\text{Mg}$ -  
102  $[\text{Li}_2\text{Si}_2\text{N}_6]\text{:Eu}^{2+}$  were obtained embedded in an amorphous powder.  
103 Additionally, red rod-shaped crystals of  $\text{Ca}[\text{Mg}_3\text{SiN}_4]\text{:Eu}^{2+}$ , colorless  
104 crystals of LiF, and some metallic residues were found as side phases of  
105 the reaction. The sample is sensitive toward air and moisture and  
106 partially shows intensive red luminescence under irradiation with  
107 ultraviolet (UV) to green light.

108 **Single-Crystal X-ray Diffraction.** Single crystals of  $\text{Ca}_3\text{Mg}$ -  
109  $[\text{Li}_2\text{Si}_2\text{N}_6]\text{:Eu}^{2+}$  were isolated from the reaction product, washed with  
110 dry paraffin oil, and enclosed in glass capillaries, which were sealed  
111 under argon to avoid hydrolysis. X-ray diffraction data were collected  
112 on a Stoe IPDS I diffractometer (Mo K $\alpha$  radiation, graphite  
113 monochromator). Structure solution was performed in SHELXS-  
114 97,<sup>37</sup> by using direct methods. The crystal structure was refined by full-  
115 matrix least-squares calculation on  $|F|^2$  in SHELXL-97<sup>38,39</sup> with  
116 anisotropic displacement parameters for all atoms. Further details of  
117 the crystal-structure refinement may be obtained from the  
118 Fachinformationszentrum Karlsruhe, 76344 Eggenstein-Leopoldsha-  
119 fen, Germany (Fax: + 49-7247-808-666; E-mail: [crysdata@fiz-](mailto:crysdata@fiz-karlsruhe.de)  
120 [karlsruhe.de](mailto:karlsruhe.de)), on quoting the depository number CSD-432605.

121 **Scanning Electron Microscopy.** The chemical composition of  
122  $\text{Ca}_3\text{Mg}[\text{Li}_2\text{Si}_2\text{N}_6]\text{:Eu}^{2+}$  was confirmed by energy dispersive X-ray  
123 spectroscopy (FEI Helios G3 UC scanning electron microscope  
124 equipped with an EDX detector, scanning transmission detector, and  
125 focused ion beam). The reaction product was placed on an adhesive  
126 conductive carbon pad and coated with a conductive carbon film  
127 (BAL-TEC MED 020, Bal Tec AG).

128 **Luminescence.** Luminescence investigations on single crystals of  
129  $\text{Ca}_3\text{Mg}[\text{Li}_2\text{Si}_2\text{N}_6]\text{:Eu}^{2+}$  were performed using a luminescence micro-  
130 scope, consisting of a HORIBA Fluorimax4 Spectrofluorimeter system,  
131 which is attached to an Olympus BX51 microscope via fiber optics.  
132 The single crystals were measured in sealed glass capillaries with an  
133 excitation wavelength of 440 nm. The emission spectrum was  
134 measured between 460 and 800 nm; the excitation spectrum was  
135 measured between 380 and 680 nm, with a step size of 2 nm. Because  
136  $\text{Ca}_3\text{Mg}[\text{Li}_2\text{Si}_2\text{N}_6]\text{:Eu}^{2+}$  shows emission beyond 800 nm and the  
137 spectrometer is only calibrated for wavelengths up to 800 nm,  
138 emission peak in the near-infrared was simulated using a Gauss-fit.

## 139 ■ RESULTS AND DISCUSSION

140 **Synthesis and Chemical Analysis.** Solid-state metathesis  
141 reaction as described above yielded a heterogeneous reaction  
142 mixture containing single-crystals of  $\text{Ca}_3\text{Mg}[\text{Li}_2\text{Si}_2\text{N}_6]\text{:Eu}^{2+}$ .

The crystals show orange body color and undergo rapid  
hydrolysis when exposed to air. The elemental composition was  
determined by energy-dispersive X-ray spectroscopy (EDX).  
Using this method, light elements like N cannot be determined  
with a reasonable degree of accuracy, also Li is not  
determinable. The atomic ratio Ca/Mg/Si of 3.0/1.1/2.0 (six  
measurements on different crystals), normalized to the Ca  
content, is in good agreement with the sum formula obtained  
from single-crystal structure analysis. Besides a small amount of  
oxygen, which can be attributed to superficial hydrolysis of the  
product, no further elements were detected.

**Single-Crystal Structure Analysis.** The crystal structure  
of  $\text{Ca}_3\text{Mg}[\text{Li}_2\text{Si}_2\text{N}_6]\text{:Eu}^{2+}$  was solved and refined in the  
monoclinic space group  $C2/m$  (no. 12) with  $a = 5.966(1)$ ,  $b =$   
 $9.806(2)$ ,  $c = 11.721(2)$  Å, and  $\beta = 99.67(3)^\circ$ . The  
crystallographic data are summarized in Table 1. Atomic

**Table 1. Crystallographic Data of the Single-Crystal  
Structure Determination of  $\text{Ca}_3\text{Mg}[\text{Li}_2\text{Si}_2\text{N}_6]\text{:Eu}^{2+}$**

|                                                                                 |                                                                           |
|---------------------------------------------------------------------------------|---------------------------------------------------------------------------|
| formula                                                                         | $\text{Ca}_3\text{Mg}[\text{Li}_2\text{Si}_2\text{N}_6]\text{:Eu}^{2+}$   |
| crystal system                                                                  | monoclinic                                                                |
| space group                                                                     | $C2/m$ (no. 12)                                                           |
| lattice parameters/Å,°                                                          | $a = 5.966(1)$<br>$b = 9.806(2)$<br>$c = 11.721(2)$<br>$\beta = 99.67(3)$ |
| cell volume/Å <sup>3</sup>                                                      | 675.9(2)                                                                  |
| formula units/unit cell                                                         | 4                                                                         |
| density/g·cm <sup>-3</sup>                                                      | 2.935                                                                     |
| $\mu/\text{mm}^{-1}$                                                            | 2.827                                                                     |
| $T/\text{K}$                                                                    | 293(2)                                                                    |
| diffractometer                                                                  | Stoe IPDS I                                                               |
| radiation                                                                       | Mo K $\alpha$ ( $\lambda = 0.71073$ Å), graphite<br>monochromator         |
| $F(000)$                                                                        | 592                                                                       |
| profile range                                                                   | $4.04 \leq \theta \leq 29.90$                                             |
| index ranges                                                                    | $-8 \leq h \leq 8$<br>$-13 \leq k \leq 13$<br>$-16 \leq l \leq 16$        |
| independent reflections                                                         | 1028 [ $R(\text{int}) = 0.0722$ ]                                         |
| refined parameters                                                              | 72                                                                        |
| goodness of fit                                                                 | 1.323                                                                     |
| $R_1$ (all data); $R_1$ ( $F^2 > 2\sigma(F^2)$ )                                | 0.0770, 0.0618                                                            |
| $wR_2$ (all data); $wR_2$ ( $F^2 > 2\sigma(F^2)$ )                              | 0.1118, 0.1080                                                            |
| $\Delta\rho_{\text{max}}, \Delta\rho_{\text{min}}/\text{e} \cdot \text{Å}^{-3}$ | 0.826, -1.176                                                             |

coordinates, Wyckoff positions, and isotropic displacement  
parameters are listed in Table 2. Selected bond lengths and  
angles as well as anisotropic displacement parameters are given  
in the Supporting Information (Tables S1–S3). Given the  
small dopant concentration and, therefore, the insignificant  
scattering intensity,  $\text{Eu}^{2+}$  was neglected during structure  
refinement.

The crystal structure of  $\text{Ca}_3\text{Mg}[\text{Li}_2\text{Si}_2\text{N}_6]\text{:Eu}^{2+}$  is closely  
related to that of  $\text{Ca}_2\text{Mg}[\text{Li}_4\text{Si}_2\text{N}_6]$ ,<sup>12</sup> which has already been  
reported in the literature. Both structures contain identical  
layers of  $\text{LiN}_4$  and  $\text{SiN}_4$  tetrahedra as well as Ca and Mg ions,  
which are located between the layers. Since Li as well as Si are  
part of the tetrahedral network, the compounds can be more  
precisely classified as nitridolithosilicates. The arrangement of  
tetrahedra within one layer is shown in Figure 1. It consists of  
vertex- and corner-sharing  $\text{LiN}_4$  tetrahedra forming *achter*  
rings,<sup>40</sup> intercalated by edge-sharing  $[\text{Si}_2\text{N}_6]^{10-}$  “bow-tie” units.

Table 2. Atomic Coordinates, Wyckoff Positions, and Equivalent Isotropic Displacement Parameters of  $\text{Ca}_3\text{Mg}[\text{Li}_2\text{Si}_2\text{N}_6]:\text{Eu}^{2+}$ 

| atom | Wyck. | <i>x</i>   | <i>y</i>    | <i>z</i>   | $U_{\text{eq}}/\text{\AA}^2$ |
|------|-------|------------|-------------|------------|------------------------------|
| Ca1  | 8j    | 0.0500(2)  | 0.32384(11) | 0.24678(9) | 0.0068(2)                    |
| Ca2  | 4h    | 0          | 0.1840(2)   | 1/2        | 0.0085(3)                    |
| Si1  | 4i    | 0.3521(3)  | 0           | 0.4192(2)  | 0.0050(4)                    |
| Si2  | 4i    | 0.6885(3)  | 0           | 0.0632(2)  | 0.0048(4)                    |
| Mg1  | 4i    | 0.0623(5)  | 0           | 0.2220(2)  | 0.0094(5)                    |
| Li1  | 8j    | 0.1731(18) | 0.1767(11)  | 0.0594(8)  | 0.015(2)                     |
| N1   | 8j    | 0.2335(7)  | 0.1447(4)   | 0.3513(4)  | 0.0070(8)                    |
| N2   | 8j    | 0.3413(7)  | 0.3566(5)   | 0.1179(4)  | 0.0064(8)                    |
| N3   | 4i    | 0.3418(10) | 0           | 0.5703(5)  | 0.0084(12)                   |
| N4   | 4i    | 0.3943(11) | 0           | 0.0921(5)  | 0.0068(11)                   |

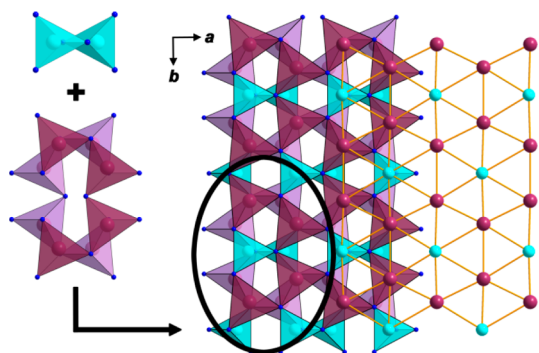

**Figure 1.** Details of layers in  $\text{Ca}_3\text{Mg}[\text{Li}_2\text{Si}_2\text{N}_6]:\text{Eu}^{2+}$ . Left:  $[\text{Si}_2\text{N}_6]^{10-}$  bow-tie units (turquoise) and *achter* rings of  $\text{LiN}_4$  tetrahedra (violet). Right: Layer made up of bow-tie units and *achter* rings forming two sublayers of condensed *dreier* rings; only one of them is shown for reasons of clarity.

from 2.088(11) to 2.225(11) Å and are in good agreement with distances known from other nitrides and with the sum of the ionic radii.<sup>11,44–46</sup>

$\text{Ca}^{2+}$  and  $\text{Mg}^{2+}$  ions balance the charges of the anionic framework. Its coordination spheres are displayed in Figure 3.

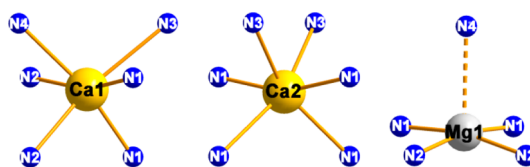

**Figure 3.** Coordination spheres of counterions  $\text{Ca}^{2+}$  and  $\text{Mg}^{2+}$ .

$\text{Ca}^{2+}$  occupies two different sites with distorted octahedral coordination by N and with distances varying from 2.310(4)–2.744(5) Å.  $\text{Mg}^{2+}$  exhibits 4-fold rectangular surroundings by N. Mg–N bond lengths are in a range of 2.159(5)–2.199(5) Å. Additionally, there is one further N atom at a distance of 2.693(7) Å, its coordination to Mg1 is illustrated in Figure 3 by a dashed line. Ca–N as well as Mg–N distances correspond to the sums of the ionic radii (2.55 and 2.10 Å, respectively)<sup>45</sup> as well as to distances known from other nitridosilicates.<sup>1,12,16</sup> The Madelung part of the lattice energy has been calculated to confirm the crystal structure of  $\text{Ca}_3\text{Mg}[\text{Li}_2\text{Si}_2\text{N}_6]:\text{Eu}^{2+}$ . Therefore, the charge, distance, and coordination spheres of constituting ions were taken into account. MAPLE values for  $\text{Ca}_3\text{Mg}[\text{Li}_2\text{Si}_2\text{N}_6]:\text{Eu}^{2+}$  and its constituting binary and ternary nitrides are given in Table 3. The resulting deviation of 0.31% verifies the electrostatic consistency of the refined structure.

**Luminescence.** Addition of  $\text{EuF}_3$  to the starting materials yielded a gray microcrystalline sample containing orange-

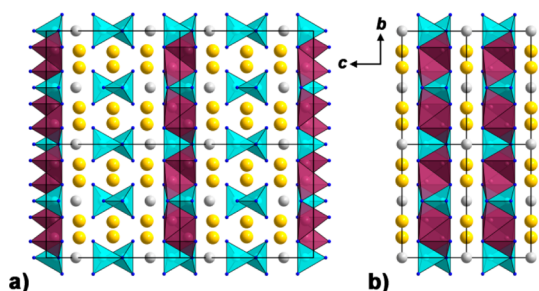

**Figure 2.** Crystal structures of  $\text{Ca}_3\text{Mg}[\text{Li}_2\text{Si}_2\text{N}_6]:\text{Eu}^{2+}$  (a) and  $\text{Ca}_2\text{Mg}[\text{Li}_4\text{Si}_2\text{N}_6]$  (b).

**Table 3.** MAPLE Values and MAPLE Sums/ $\text{kJ}\cdot\text{mol}^{-1}$  for  $\text{Ca}_3\text{Mg}[\text{Li}_2\text{Si}_2\text{N}_6]:\text{Eu}^{2+\alpha}$

| atom                                                                                                                                                                                                                                     | MAPLE | atom             | MAPLE | $\Sigma, \Delta$  |
|------------------------------------------------------------------------------------------------------------------------------------------------------------------------------------------------------------------------------------------|-------|------------------|-------|-------------------|
| $\text{Ca}^{2+}$                                                                                                                                                                                                                         | 2083  | $\text{Li}^{1+}$ | 717   |                   |
| $\text{Ca}^{2+}$                                                                                                                                                                                                                         | 1812  | $\text{N}^{3-}$  | 5056  |                   |
| $\text{Si}^{4+}$                                                                                                                                                                                                                         | 9201  | $\text{N}^{2+}$  | 4951  |                   |
| $\text{Si}^{4+}$                                                                                                                                                                                                                         | 9202  | $\text{N}^{3-}$  | 5440  | $\Sigma = 58949$  |
| $\text{Mg}^{2+}$                                                                                                                                                                                                                         | 2241  | $\text{N}^{4-}$  | 5439  | $\Delta = 0.31\%$ |
| total MAPLE: $\text{Ca}_3\text{Mg}[\text{Li}_2\text{Si}_2\text{N}_6] = \text{Ca}_3\text{N}_2 + 1/3\cdot\text{Mg}_3\text{N}_2 + 2/3\cdot\text{Li}_2\text{SiN}_2 + 2/3\cdot\text{LiSi}_2\text{N}_3 = 59131 \text{ kJ}\cdot\text{mol}^{-1}$ |       |                  |       |                   |

<sup>a</sup> $\Delta$  is the deviation between the MAPLE sum of  $\text{Ca}_3\text{Mg}[\text{Li}_2\text{Si}_2\text{N}_6]:\text{Eu}^{2+}$  and the MAPLE sum of constituting binary and ternary nitrides. Typical partial MAPLE values/ $\text{kJ}\cdot\text{mol}^{-1}$ :  $\text{Ca}^{2+}$ : 1700–2200;  $\text{Mg}^{2+}$ : 2100–2500;  $\text{Li}^{+}$ : 550–860;  $\text{Si}^{4+}$ : 9000–10200;  $\text{N}^{3-}$ : 4300–6200.<sup>9,16,50,51</sup>



colored crystals of  $\text{Ca}_3\text{Mg}[\text{Li}_2\text{Si}_2\text{N}_6]:\text{Eu}^{2+}$ . Under blue irradiation, the sample shows luminescence in the red spectral region. Because of inhomogeneity of the sample, luminescence investigations have been performed on single crystals of  $\text{Ca}_3\text{Mg}[\text{Li}_2\text{Si}_2\text{N}_6]:\text{Eu}^{2+}$  in sealed silica glass capillaries. All crystals show comparable red emission under blue irradiation. Excitation of the title compound with a nominal dopant concentration of 1.7 mol % at 440 nm yields an emission band with a maximum at 734 nm and a full width at half-maximum (fwhm) of  $2293\text{ cm}^{-1}$  (124 nm). The  $\text{Eu}^{2+}$ -doped compound exhibits a maximum absorption around 450 nm and is therefore efficiently excitable with UV to blue light, as provided, for example, by (In,Ga)N-LEDs. Excitation and emission spectra are illustrated in Figure 4.

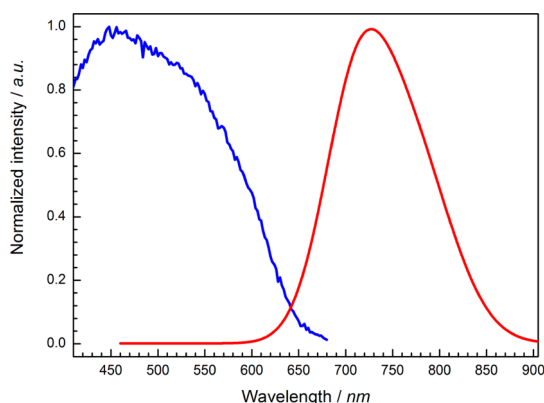

**Figure 4.** Excitation (blue) and emission (red) spectra of  $\text{Ca}_3\text{Mg}[\text{Li}_2\text{Si}_2\text{N}_6]:\text{Eu}^{2+}$ .

The broad emission band of  $\text{Ca}_3\text{Mg}[\text{Li}_2\text{Si}_2\text{N}_6]:\text{Eu}^{2+}$  is assigned to parity allowed  $4f^65d^1 \rightarrow 4f^7$  transitions in  $\text{Eu}^{2+}$ .<sup>33,52,53</sup> Since  $\text{Eu}^{2+}$  is expected to occupy the Ca site, we assume that luminescence originates from octahedrally coordinated  $\text{Eu}^{2+}$  ions. The presence of two crystallographically different Ca sites with slightly differing distortion of the octahedra and therefore different interatomic distances influences the width of the emission band by broadening. A comparable 6-fold coordination can also be found in  $\text{Ba}_3\text{Si}_6\text{O}_{12}\text{N}_2$ <sup>54</sup> and its solid-solution series  $\text{Ba}_{1-x}\text{Sr}_x\text{Si}_6\text{O}_{12}\text{N}_2$  with  $x \approx 0.4$  and 1. These compounds doped with 2 mol %  $\text{Eu}^{2+}$  exhibit broad emission bands with maxima between 523 and 549 nm (green luminescence) when irradiated with near-UV to blue light. In general, both the spectral position and the bandwidth of the emission strongly depend on the energy level of 5d states of the activator ion, which in turn is influenced by the host lattice. The stronger the covalent interactions between  $\text{Eu}^{2+}$  and its surroundings, the smaller is the transition energy between 4f and 5d orbitals of the activator ion (nephelauxetic effect). For this reason and because of the higher formal charge of  $\text{N}^{3-}$  compared to  $\text{O}^{2-}$ , the 5d states of  $\text{Eu}^{2+}$  in  $\text{Ca}_3\text{Mg}[\text{Li}_2\text{Si}_2\text{N}_6]:\text{Eu}^{2+}$  are at lower energies than those in  $\text{Ba}_3\text{Si}_6\text{O}_{12}\text{N}_2:\text{Eu}^{2+}$  and  $\text{Ba}_{1-x}\text{Sr}_x\text{Si}_6\text{O}_{12}\text{N}_2:\text{Eu}^{2+}$ , respectively, and emission of  $\text{Ca}_3\text{Mg}[\text{Li}_2\text{Si}_2\text{N}_6]:\text{Eu}^{2+}$  occurs at longer wavelengths.

Typical  $\text{Eu}^{2+}$  emission of other compound classes are in a range of 356–461 nm (fluorides), 360–540 nm (oxosilicates), 420–555 nm (aluminates and gallates), 470–660 nm (sulfides), and 529–670 nm (nitrides).<sup>55,56</sup> The here presented nitridolithosilicate  $\text{Ca}_3\text{Mg}[\text{Li}_2\text{Si}_2\text{N}_6]:\text{Eu}^{2+}$  is to the best of our

knowledge and, except for  $\text{CaO}:\text{Eu}^{2+}$  ( $\lambda_{\text{em}} = 733\text{ nm}$ )<sup>57,58</sup> and  $\text{MH}_2:\text{Eu}^{2+}$  ( $M = \text{Ca}, \text{Sr}, \text{Ba}$ ;  $\lambda_{\text{em}} = 728\text{--}764\text{ nm}$ ),<sup>59</sup> the first and so far the only  $\text{Eu}^{2+}$ -doped nitridosilicate that emits at fairly long wavelengths of  $>700\text{ nm}$ .

Recently, we reported on luminescence investigations of the nitridomagnosilicate  $\text{Li}_2(\text{Ca}_{1-x}\text{Sr}_x)_2[\text{Mg}_2\text{Si}_2\text{N}_6]:\text{Eu}^{2+}$  ( $x = 0$  and 0.06),<sup>60</sup> with a nominal dopant concentration of 1 mol %. Just as  $\text{Ca}_3\text{Mg}[\text{Li}_2\text{Si}_2\text{N}_6]:\text{Eu}^{2+}$ , the crystal structure of  $\text{Li}_2(\text{Ca}_{1-x}\text{Sr}_x)_2[\text{Mg}_2\text{Si}_2\text{N}_6]:\text{Eu}^{2+}$  contains  $[\text{Si}_2\text{N}_6]^{10-}$  bow-tie units. In contrast to the here presented nitridolithosilicate with  $\text{LiN}_4$  and  $\text{SiN}_4$  tetrahedra as network-building structural motifs and  $\text{Ca}^{2+}$  and  $\text{Mg}^{2+}$  as counterions,  $\text{Li}^+$  and  $\text{Ca}^{2+}$  compensate the negative charge of the network, which, in  $\text{Li}_2(\text{Ca}_{1-x}\text{Sr}_x)_2[\text{Mg}_2\text{Si}_2\text{N}_6]:\text{Eu}^{2+}$ , is made up of  $\text{MgN}_4$  and  $\text{SiN}_4$  tetrahedra. In the latter compound, chains of edge-sharing  $\text{MgN}_4$  tetrahedra are interconnected by bow-tie units, forming *vierer* and *sechser* ring channels along  $[100]$ . Whereas  $\text{Li}^+$  ions are located within *vierer* ring channels,  $\text{Ca}^{2+}$  ( $\text{Sr}^{2+}$ ) ions, and therefore also  $\text{Eu}^{2+}$  ions show distorted octahedral coordination by N within *sechser* ring channels. When irradiated with blue light, narrow-band red emission also occurs at rather long wavelengths of 638 nm ( $x = 0$ ) and 634 nm ( $x = 0.6$ ) with fwhm =  $1513\text{--}1532\text{ cm}^{-1}$ , respectively.

Both  $\text{Li}_2(\text{Ca}_{1-x}\text{Sr}_x)_2[\text{Mg}_2\text{Si}_2\text{N}_6]:\text{Eu}^{2+}$  and  $\text{Ca}_3\text{Mg}[\text{Li}_2\text{Si}_2\text{N}_6]:\text{Eu}^{2+}$  exhibit similar body colors and show similarities in their absorption bands. The main difference between both nitridosilicates is the Stokes shift, which is larger for  $\text{Ca}_3\text{Mg}[\text{Li}_2\text{Si}_2\text{N}_6]:\text{Eu}^{2+}$ . This can be attributed to differences in the chemical surroundings of  $\text{Eu}^{2+}$ , which in each case is expected to occupy the  $\text{Ca}^{2+}$  ( $\text{Sr}^{2+}$ ) site, and also to differences in the phonon frequencies of respective host lattices.  $\text{Li}_2(\text{Ca}_{1-x}\text{Sr}_x)_2[\text{Mg}_2\text{Si}_2\text{N}_6]:\text{Eu}^{2+}$  exhibits only one crystallographic Ca site (Wyckoff position 4g of space group  $C2/m$ ) with three different Ca–N distances between 2.49 and 2.75 Å. In  $\text{Ca}_3\text{Mg}[\text{Li}_2\text{Si}_2\text{N}_6]:\text{Eu}^{2+}$ , nine interatomic distances Ca–N of two Ca sites (Wyckoff positions 8j and 4h of space group  $C2/m$ ) vary between 2.31 and 2.74 Å. This is, in comparison, a significantly larger spread and entails chemical differentiation of both sites, which eventually leads to a composed emission band of  $\text{Eu}^{2+}$  on either of the crystallographic sites. Moreover, the shorter bond lengths Ca–N in  $\text{Ca}_3\text{Mg}[\text{Li}_2\text{Si}_2\text{N}_6]:\text{Eu}^{2+}$ , especially occurring on the lowest symmetry Ca1 site, may entail efficient energy transfer from  $\text{Eu}^{2+}$  incorporated on the larger higher symmetry Ca2 site and thus also leads to a more pronounced red shift of the emission band for the Eu doping concentration investigated in this report. Whereas in  $\text{Li}_2(\text{Ca}_{1-x}\text{Sr}_x)_2[\text{Mg}_2\text{Si}_2\text{N}_6]:\text{Eu}^{2+}$ , infinite chains of edge-sharing  $\text{MgN}_4$  tetrahedra are interconnected by  $[\text{Si}_2\text{N}_6]^{10-}$  bow-tie units leading to a three-periodic network,  $\text{Ca}_3\text{Mg}[\text{Li}_2\text{Si}_2\text{N}_6]:\text{Eu}^{2+}$  consists of layers made up of  $\text{LiN}_4$  and  $\text{SiN}_4$  tetrahedra and isolated bow-tie units. Consequently, because of the lower degree of condensation and also the lower symmetry of the Ca1 site with its short Ca–N contact lengths, local lattice relaxation of  $\text{Eu}^{2+}$  in its excited state in  $\text{Ca}_3\text{Mg}[\text{Li}_2\text{Si}_2\text{N}_6]:\text{Eu}^{2+}$  is expected to be larger than in  $\text{Li}_2(\text{Ca}_{1-x}\text{Sr}_x)_2[\text{Mg}_2\text{Si}_2\text{N}_6]:\text{Eu}^{2+}$ ,<sup>61</sup> resulting in a larger Stokes shift of the title compound.

Red emission and extremely narrow band widths with fwhm  $<1200\text{ cm}^{-1}$  have been reported for  $\text{Sr}[\text{Mg}_3\text{Si}_4\text{N}_4]:\text{Eu}^{2+}$  ( $1170\text{ cm}^{-1}$ ) and  $\text{Sr}[\text{LiAl}_3\text{N}_4]:\text{Eu}^{2+}$  ( $1180\text{ cm}^{-1}$ ).<sup>16,34</sup> Both compounds show a highly symmetric cube-like coordination of the alkaline earth ion by N.

## CONCLUSIONS

In this contribution, we report on  $\text{Ca}_3\text{Mg}[\text{Li}_2\text{Si}_2\text{N}_6]:\text{Eu}^{2+}$ , a new nitridolithosilicate with exceptional luminescence properties. The compound was synthesized by solid-state metathesis reaction and could be obtained as orange-colored single crystals within an amorphous powder. The crystal structure of  $\text{Ca}_3\text{Mg}[\text{Li}_2\text{Si}_2\text{N}_6]:\text{Eu}^{2+}$  is related to that of  $\text{Ca}_2\text{Mg}[\text{Li}_4\text{Si}_2\text{N}_6]$ . It consists of corner- and edge-sharing  $\text{LiN}_4$  tetrahedra, intercalated by  $[\text{Si}_2\text{N}_6]^{10-}$  bow-tie units forming anionic layers, which are separated by isolated  $[\text{Si}_2\text{N}_6]^{10-}$  bow-tie units and  $\text{Ca}^{2+}$  and  $\text{Mg}^{2+}$  ions. The latter two act as counterions and compensate the negative charge of the anionic framework. Up to now, only a small number of nitridosilicates containing  $\text{Li}^+$  and  $\text{Mg}^{2+}$  ions are known from literature, namely  $\text{Ca}_2\text{Mg}[\text{Li}_4\text{Si}_2\text{N}_6]$ ,  $\text{Li}_2\text{Ca}_2[\text{Mg}_2\text{Si}_2\text{N}_6]$ , and  $\text{Li}_2(\text{Ca}_{1.88}\text{Sr}_{0.12})[\text{Mg}_2\text{Si}_2\text{N}_6]$ .<sup>12,60</sup> Thereby,  $\text{Li}^+$  and  $\text{Mg}^{2+}$  ions may either be part of the tetrahedral network or act as counterions. This behavior may significantly increase the variety of possible structures within the class of nitridosilicates.

Recently, the quest for narrow-band red-emitting phosphors has been triggered by attempts to improve luminescence properties of commercially available pc-LEDs for general illumination and signaling purposes.<sup>16,34,62</sup> Meanwhile, LED technology for other specific applications is on the advance and will increasingly be pursued. This includes, for example, LED technology for plants, in order to replace currently used lamps to reduce costs and, seen in the long term, improve productivity by optimizing growth environments.<sup>63</sup> Similar to requirements for LEDs applied for general illumination, LEDs with regard to application in horticulture have to be cheap, environmentally friendly, highly efficient, and reliable. Luminescence investigations on  $\text{Ca}_3\text{Mg}[\text{Li}_2\text{Si}_2\text{N}_6]:\text{Eu}^{2+}$  show red emission peaking at 734 nm and a fwhm of  $2293\text{ cm}^{-1}$  (124 nm). This represents an unexpected emission at fairly long wavelengths, not yet known for  $\text{Eu}^{2+}$ -doped nitrides. Despite emission  $>700\text{ nm}$  and, therefore, too high energy loss beyond the sensitivity of the human eye when applied in pc-LEDs,  $\text{Ca}_3\text{Mg}[\text{Li}_2\text{Si}_2\text{N}_6]:\text{Eu}^{2+}$  may find application in more specialized fields like horticultural lighting.

## ASSOCIATED CONTENT

### Supporting Information

The Supporting Information is available free of charge on the ACS Publications website at DOI: 10.1021/acs.chemmater.7b00871.

Selected bond lengths in  $\text{Ca}_3\text{Mg}[\text{Li}_2\text{Si}_2\text{N}_6]:\text{Eu}^{2+}$ , selected bond angles in  $\text{Ca}_3\text{Mg}[\text{Li}_2\text{Si}_2\text{N}_6]:\text{Eu}^{2+}$ , and anisotropic displacement parameters for  $\text{Ca}_3\text{Mg}[\text{Li}_2\text{Si}_2\text{N}_6]:\text{Eu}^{2+}$  (PDF)

## AUTHOR INFORMATION

### Corresponding Author

\*E-mail: wolfgang.schnick@uni-muenchen.de.

### ORCID

Wolfgang Schnick: 0000-0003-4571-8035

### Notes

The authors declare no competing financial interest.

## ACKNOWLEDGMENTS

The authors thank Philipp Bielec for collecting single-crystal X-ray data as well as Christian Minke (both at Department of

Chemistry, University of Munich) for EDX measurements. Our thanks also go to Petra Huppertz (Lumileds Development Center Aachen) for luminescence measurements as well as Volker Weiler and Peter Schmidt (Lumileds Development Center Aachen) for discussions. Financial support from the Fonds der Chemischen Industrie (FCI) is gratefully acknowledged.

## REFERENCES

- Gál, Z. A.; Mallinson, P. M.; Orchard, H. J.; Clarke, S. J. Synthesis and Structure of Alkaline Earth Silicon Nitrides:  $\text{BaSiN}_2$ ,  $\text{SrSiN}_2$ , and  $\text{CaSiN}_2$ . *Inorg. Chem.* **2004**, *43*, 3998–4006.
- Yamane, H.; DiSalvo, F. J. Preparation and crystal structure of a new barium silicon nitride,  $\text{Ba}_5\text{Si}_2\text{N}_6$ . *J. Alloys Compd.* **1996**, *240*, 33–36.
- Watanabe, T.; Nonaka, K.; Li, J.; Kishida, K.; Yoshimura, M. Low temperature ammonothermal synthesis of europium-doped  $\text{SrAlSiN}_3$  for a nitride red phosphor. *J. Ceram. Soc. Jpn.* **2012**, *120*, 500–502.
- Richter, T. M. M.; Niewa, R. Chemistry of Ammonothermal Synthesis. *Inorganics* **2014**, *2*, 29–78.
- Schlieper, T.; Schnick, W. Hochtemperatur-Synthese und Kristallstruktur von  $\text{Ca}_2\text{Si}_3\text{N}_8$ . *Z. Anorg. Allg. Chem.* **1995**, *621*, 1037–1041.
- Schnick, W.; Huppertz, H. Nitridosilicates - A Significant Extension of Silicate Chemistry. *Chem. - Eur. J.* **1997**, *3*, 679–683.
- Durach, D.; Schnick, W. Non-Condensed (Oxo)Nitridosilicates:  $\text{La}_3[\text{SiN}_4]\text{F}$  and the Polymorph  $\text{o-La}_3[\text{SiN}_3\text{O}]\text{O}$ . *Eur. J. Inorg. Chem.* **2015**, 4095–4100.
- Wolke, M.; Jeitschko, W. Preparation and Crystal Structure of the Nitridosilicates  $\text{Ln}_3\text{Si}_6\text{N}_{11}$  ( $\text{Ln} = \text{La, Ce, Pr, Nd, Sm}$ ) and  $\text{LnSi}_3\text{N}_5$  ( $\text{Ln} = \text{Ce, Pr, Nd}$ ). *Inorg. Chem.* **1995**, *34*, 5105–5108.
- Zeuner, M.; Pagano, S.; Schnick, W. Nitridosilicates and Oxonitridosilicates: From Ceramic Materials to Structural and Functional Diversity. *Angew. Chem.* **2011**, *123*, 7898–7920; *Angew. Chem., Int. Ed.* **2011**, *50*, 7754–7775.
- Kubus, M.; Meyer, H.-J. A Low-Temperature Synthesis Route for  $\text{CaAlSiN}_3$  Doped with  $\text{Eu}^{2+}$ . *Z. Anorg. Allg. Chem.* **2013**, *639*, 669–671.
- Pust, P.; Wochnik, A. S.; Baumann, E.; Schmidt, P. J.; Wiechert, D.; Scheu, C.; Schnick, W.  $\text{Ca}[\text{LiAl}_3\text{N}_4]:\text{Eu}^{2+}$  - A Narrow-Band Red-Emitting Nitridolithoaluminate. *Chem. Mater.* **2014**, *26*, 3544–3549.
- Schmiechen, S.; Nietschke, F.; Schnick, W. Structural Relationship between the Mg-containing Nitridosilicates  $\text{Ca}_2\text{Mg}[\text{Li}_4\text{Si}_2\text{N}_6]$  and  $\text{Li}_2\text{Ca}_2[\text{Mg}_2\text{Si}_2\text{N}_6]$ . *Eur. J. Inorg. Chem.* **2015**, 1592–1597.
- Strobel, P.; Schmiechen, S.; Siegert, M.; Tücks, A.; Schmidt, P. J.; Schnick, W. Narrow-Band Green Emitting Nitridolithosilicate  $\text{Ba}[\text{Li}_2(\text{Al}_2\text{Si}_2\text{N}_6)]:\text{Eu}^{2+}$  with Framework Topology *why* for LED/LCD Backlight Applications. *Chem. Mater.* **2015**, *27*, 6109–6115.
- Poesl, C.; Neudert, L.; Schnick, W. Layered Nitridomagnosilicates  $\text{CaMg}_2\text{Ga}_2\text{N}_4$  and  $\text{CaMg}_2\text{Ga}_2\text{N}_4$ . *Eur. J. Inorg. Chem.* **2017**, 1067–1074.
- Meyer, H.-J. Solid state metathesis reactions as a conceptual tool in the synthesis of new materials. *Dalton Trans.* **2010**, *39*, 5973–5982.
- Schmiechen, S.; Schneider, H.; Wagatha, P.; Hecht, C.; Schmidt, P. J.; Schnick, W. Towards New Phosphors for Application in Illumination-Grade White pc-LEDs: The Nitridomagnosilicates  $\text{Ca}[\text{Mg}_3\text{SiN}_4]:\text{Ce}^{3+}$ ,  $\text{Sr}[\text{Mg}_3\text{SiN}_4]:\text{Eu}^{2+}$ , and  $\text{Eu}[\text{Mg}_3\text{SiN}_4]$ . *Chem. Mater.* **2014**, *26*, 2712–2719.
- Schmiechen, S.; Strobel, P.; Hecht, C.; Reith, T.; Siegert, M.; Schmidt, P. J.; Huppertz, P.; Wiechert, D.; Schnick, W. Nitridomagnosilicate  $\text{Ba}[\text{Mg}_3\text{SiN}_4]:\text{Eu}^{2+}$  and Structure-Property Relations of Similar Narrow-Band Red Nitride Phosphors. *Chem. Mater.* **2015**, *27*, 1780–1785.
- Takeda, T.; Hirotsaki, N.; Funahashi, S.; Xie, R.-J. Narrow-Band Green-Emitting Phosphor  $\text{Ba}_2\text{LiSi}_7\text{AlN}_{12}:\text{Eu}^{2+}$  with High Thermal Stability Discovered by a Single Particle Diagnosis Approach. *Chem. Mater.* **2015**, *27*, 5892–5898.



- (19) Uheda, K.; Hirosaki, N.; Yamamoto, H. Host lattice materials in the system  $\text{Ca}_3\text{N}_2$  -  $\text{AlN}$  -  $\text{Si}_3\text{N}_4$  for white light emitting diode. *Phys. Status Solidi A* **2006**, 203, 2712–2717.
- (20) Park, D. G.; Dong, Y.; DiSalvo, F. J.  $\text{Sr}(\text{Mg}_3\text{Ge})\text{N}_4$  and  $\text{Sr}(\text{Mg}_2\text{Ga}_2)\text{N}_4$ : New isostructural Mg-containing quaternary nitrides with nitridometallate anions of  $[(\text{Mg}_3\text{Ge})\text{N}_4]^{2-}$  and  $[(\text{Mg}_2\text{Ga}_2)\text{N}_4]^{2-}$  in a 3D-network structure. *Solid State Sci.* **2008**, 10, 1846–1852.
- (21) Pust, P.; Hintze, F.; Hecht, C.; Weiler, V.; Locher, A.; Zitnanska, D.; Harm, S.; Wiechert, D.; Schmidt, P. J.; Schnick, W. Group (III) Nitrides  $\text{M}[\text{Mg}_2\text{Al}_2\text{N}_4]$  ( $\text{M} = \text{Ca}, \text{Sr}, \text{Ba}, \text{Eu}$ ) and  $\text{Ba}[\text{Mg}_2\text{Ga}_2\text{N}_4]$  - Structural Relation and Nontypical Luminescence Properties of  $\text{Eu}^{2+}$  Doped Samples. *Chem. Mater.* **2014**, 26, 6113–6119.
- (22) Yamane, H.; Kikkawa, S.; Koizumi, M. Preparation of Lithium Silicon Nitrides and their Lithium Ion Conductivity. *Solid State Ionics* **1987**, 25, 183–191.
- (23) Bhamra, M. S.; Fray, D. J. The Electrochemic Properties of  $\text{Li}_3\text{AlN}_2$  and  $\text{Li}_2\text{SiN}_2$ . *J. Mater. Sci.* **1995**, 30, 5381–5388.
- (24) Ziegler, A.; Idrobo, J. C.; Cinibulk, M. K.; Kisielowski, C.; Browning, N. D.; Ritchie, R. O. Interface Structure and Atomic Bonding Characteristics in Silicon Nitride Ceramics. *Science* **2004**, 306, 1768–1770.
- (25) Jack, K. H. Sialons and Related Nitrogen Ceramics. *J. Mater. Sci.* **1976**, 11, 1135–1158.
- (26) Yamane, H.; Kikkawa, S.; Koizumi, M. Preparation and electrochemical properties of double-metal nitrides containing lithium. *J. Power Sources* **1987**, 20, 311–315.
- (27) Durach, D.; Neudert, L.; Schmidt, P. J.; Oeckler, O.; Schnick, W.  $\text{La}_3\text{BaSi}_3\text{N}_7\text{O}_2\text{:Ce}^{3+}$  - A Yellow Phosphor with an Unprecedented Tetrahedra Network Structure Investigated by Combination of Electron Microscopy and Synchrotron X-ray Diffraction. *Chem. Mater.* **2015**, 27, 4832–4838.
- (28) Wang, L.; Zhang, H.; Wang, X.-J.; Dierre, B.; Suehiro, T.; Takeda, T.; Hirosaki, N.; Xie, R.-J. Europium(II)-activated oxonitridosilicate yellow phosphor with excellent quantum efficiency and thermal stability - a robust spectral conversion material for highly efficient and reliable white LEDs. *Phys. Chem. Chem. Phys.* **2015**, 17, 15797–15804.
- (29) Höppe, H. A.; Lutz, H.; Morys, P.; Schnick, W.; Seilmeier, A. Luminescence in  $\text{Eu}^{2+}$ -doped  $\text{Ba}_2\text{Si}_5\text{N}_8$ : fluorescence, thermoluminescence, and upconversion. *J. Phys. Chem. Solids* **2000**, 61, 2001–2006.
- (30) Mueller-Mach, R.; Mueller, G.; Krames, M. R.; Höppe, H. A.; Stadler, F.; Schnick, W.; Juestel, T.; Schmidt, P. J. Highly efficient all-nitride phosphor-converted white light emitting diode. *Phys. Status Solidi A* **2005**, 202, 1727–1732.
- (31) Zeuner, M.; Schmidt, P. J.; Schnick, W. One-Pot Synthesis of Single-Source Precursors for nanocrystalline LED Phosphors  $\text{M}_2\text{Si}_5\text{N}_8\text{:Eu}^{2+}$  ( $\text{M} = \text{Sr}, \text{Ba}$ ). *Chem. Mater.* **2009**, 21, 2467–2473.
- (32) Schnick, W. Shine a light with nitrides. *Phys. Status Solidi RRL* **2009**, 3, A113–A114.
- (33) Xie, R.-J.; Hirosaki, N.; Takeda, T.; Suehiro, T. On the Performance Enhancement of Nitride Phosphors as Spectral Conversion Materials in Solid State Lighting. *ECS J. Solid State Sci. Technol.* **2013**, 2, R3031–R3040.
- (34) Pust, P.; Weiler, V.; Hecht, C.; Tücks, A.; Wochnik, A. S.; Henß, A.-K.; Wiechert, D.; Scheu, C.; Schmidt, P. J.; Schnick, W. Narrow-band red-emitting  $\text{Sr}[\text{LiAl}_3\text{N}_4]\text{:Eu}^{2+}$  as a next-generation LED-phosphor material. *Nat. Mater.* **2014**, 13, 891–896.
- (35) Krames, M.; Müller, G. O.; Mueller-Mach, R.; Bechtel, H.-H.; Schmidt, P. J., Wavelength conversion for producing white light from a high power blue light emitting diode (LED). *PCT Int. Appl. WO2010131133 A1*, 2010.
- (36) Brokamp, T. Darstellung und Charakterisierung einiger ternärer Tantalnitride mit Lithium, Magnesium oder Calcium. Thesis, Universität Dortmund, 1991.
- (37) Sheldrick, G. M. *SHELXS-97*, a program for crystal structure solution; University of Göttingen: Germany, 1997.
- (38) Sheldrick, G. M. A short history of SHELX. *Acta Crystallogr., Sect. A: Found. Crystallogr.* **2008**, 64, 112–122.
- (39) Sheldrick, G. M. *SHELXL-97*, a program for structure refinement; University of Göttingen: Germany, 1997.
- (40) Liebau, F. *Structural Chemistry of Silicates*; Springer: Berlin, 1986. The terms dreier ring, vierer ring, sechser ring and achter ring was coined by Liebau and is derived from the German words *drei* = 3, *vier* = 4, *sechs* = 6 and *acht* = 8. A dreier ring comprises three tetrahedra centers.
- (41) Pagano, S.; Lupart, S.; Zeuner, M.; Schnick, W. Tuning the Dimensionality of Nitridosilicates in Lithium Melts. *Angew. Chem.* **2009**, 121, 6453–6456; *Angew. Chem., Int. Ed.* **2009**, 48, 6335–6338.
- (42) Pagano, S.; Lupart, S.; Schmiechen, S.; Schnick, W.  $\text{Li}_4\text{Ca}_3\text{Si}_2\text{N}_6$  and  $\text{Li}_4\text{Sr}_3\text{Si}_2\text{N}_6$  - Quaternary Lithium Nitridosilicates with Isolated  $[\text{Si}_2\text{N}_6]^{10-}$  Ions. *Z. Anorg. Allg. Chem.* **2010**, 636, 1907–1909.
- (43) Zeuner, M.; Pagano, S.; Hug, S.; Pust, P.; Schmiechen, S.; Scheu, C.; Schnick, W.  $\text{Li}_2\text{CaSi}_2\text{N}_4$  and  $\text{Li}_2\text{SrSi}_2\text{N}_4$  - a Synthetic Approach to Three-Dimensional Lithium Nitridosilicates. *Eur. J. Inorg. Chem.* **2010**, 2010, 4945–4951.
- (44) Lupart, S.; Pagano, S.; Oeckler, O.; Schnick, W.  $\text{Li}_2\text{Sr}_4[\text{Si}_2\text{N}_5]\text{N}$  - A Layered Lithium Nitridosilicate Nitride. *Eur. J. Inorg. Chem.* **2011**, 2011, 2118–2123.
- (45) Baur, W. H. Effective Ionic Radii in Nitrides. *Crystallogr. Rev.* **1987**, 1, 59–83.
- (46) Wagatha, P.; Pust, P.; Weiler, V.; Wochnik, A. S.; Schmidt, P. J.; Scheu, C.; Schnick, W.  $\text{Ca}_{18.75}\text{Li}_{10.5}[\text{Al}_{39}\text{N}_{55}]\text{:Eu}^{2+}$  - Supertetrahedron Phosphor for Solid-State Lighting. *Chem. Mater.* **2016**, 28, 1220–1226.
- (47) Hübenthal, R. *MAPLE*, a program for calculation of Madelung part of lattice energy, version 4; University of Gießen: Germany, 1993.
- (48) Hoppe, R. Madelung Constants. *Angew. Chem.* **1966**, 78, 52–63; *Angew. Chem., Int. Ed. Engl.* **1966**, 5, 95–106.
- (49) Hoppe, R. The Coordination Number - an "Inorganic Chameleon". *Angew. Chem.* **1970**, 82, 7–16; *Angew. Chem., Int. Ed. Engl.* **1970**, 9, 25–34.
- (50) Lupart, S.; Gregori, G.; Maier, J.; Schnick, W.  $\text{Li}_4\text{Ln}_3[\text{Si}_{11}\text{N}_{19}\text{O}_5]\text{O}_2\text{F}_2$  with  $\text{Ln} = \text{Ce}, \text{Nd}$  - Representatives of a Family of Potential Lithium Ion Conductors. *J. Am. Chem. Soc.* **2012**, 134, 10132–10137.
- (51) Lupart, S.; Schnick, W.  $\text{LiCa}_3\text{Si}_2\text{N}_5$  - A Lithium Nitridosilicate with a  $[\text{Si}_2\text{N}_5]^{7-}$  Double-Chain. *Z. Anorg. Allg. Chem.* **2012**, 638, 2015–2019.
- (52) Dorenbos, P. Anomalous luminescence of  $\text{Eu}^{2+}$  and  $\text{Yb}^{2+}$  in inorganic compounds. *J. Phys.: Condens. Matter* **2003**, 15, 2645–2665.
- (53) Lin, Y.-C.; Karlsson, M.; Bettinelli, M. Inorganic Phosphor Materials. *Top. Curr. Chem.* **2016**, 374, 21.
- (54) Braun, C.; Seibald, M.; Börger, S. L.; Oeckler, O.; Boyko, T. D.; Moewes, A.; Miehe, G.; Tücks, A.; Schnick, W. Material Properties and Structural Characterization of  $\text{M}_3\text{Si}_6\text{O}_{12}\text{N}_2\text{:Eu}^{2+}$  ( $\text{M} = \text{Ba}, \text{Sr}$ ) - A Comprehensive Study on a Promising Green Phosphor for pc-LEDs. *Chem. - Eur. J.* **2010**, 16, 9646–9657.
- (55) Dorenbos, P. Energy of the first  $4f^7 \rightarrow 4f^65d$  transition of  $\text{Eu}^{2+}$  in inorganic compounds. *J. Lumin.* **2003**, 104, 239–260.
- (56) Wilhelm, D.; Baumann, D.; Seibald, M.; Wurst, K.; Heymann, G.; Huppertz, H. Narrow-Band Red Emission in the Nitridolithoaluminate  $\text{Sr}_4[\text{LiAl}_{11}\text{N}_{14}]\text{:Eu}^{2+}$ . *Chem. Mater.* **2017**, 29, 1204–1209.
- (57) Jaffe, P. M.; Banks, E. Oxidation States of Europium in the Alkaline Earth Oxide and Sulfide Phosphors. *J. Electrochem. Soc.* **1955**, 102, 518–523.
- (58) Yamashita, N. Coexistence of the  $\text{Eu}^{2+}$  and  $\text{Eu}^{3+}$  Centers in the  $\text{CaO:Eu}$  Powder Phosphor. *J. Electrochem. Soc.* **1993**, 140, 840–843.
- (59) Kunkel, N.; Kohlmann, H.; Sayede, A.; Springborg, M. Alkaline-Earth Metal Hydrides as Novel Host Lattices for  $\text{Eu}^{II}$  Luminescence. *Inorg. Chem.* **2011**, 50, 5873–5875.
- (60) Strobel, P.; Weiler, V.; Hecht, C.; Schmidt, P. J.; Schnick, W. Luminescence of the Narrow-Band Red Emitting Nitridomagnesium silicate  $\text{Li}_2(\text{Ca}_{1-x}\text{Sr}_x)_2[\text{Mg}_2\text{Si}_2\text{N}_6]\text{:Eu}^{2+}$  ( $x = 0\text{--}0.06$ ). *Chem. Mater.* **2017**, 29, 1377–1383.
- (61) Meijerink, A.; Blasse, G. Luminescence Properties of  $\text{Eu}^{2+}$ -Activated Alkaline Earth Haloborates. *J. Lumin.* **1989**, 43, 283–289.
- (62) Pust, P.; Schmidt, P. J.; Schnick, W. A revolution in lighting. *Nat. Mater.* **2015**, 14, 454–458.

(63) Pattison, P. M.; Tsao, J. Y.; Krames, M. R. Light-emitting diode technology status and directions: Opportunities for horticultural lighting. *Acta Hortic.* **2016**, *1134*, 413–426.
